# Supplementary material
Source: publisher site journal article supplement (https://www.dovepress.com/article/445990)
Supplement: Supplementary file 1 [file get_supplementary_file.php]

1 **Gold nanorod-loaded nano-contrast agent with**  
2 **composite shell-core structure for**  
3 **ultrasonic/photothermal imaging-guided therapy in**  
4 **ischemic muscle disorders**

5 Xiaoyi Tang<sup>1,3\*</sup>, Yijia Liu<sup>1,3\*</sup>, Mengxin Zhao<sup>2\*</sup>, Lei He<sup>2</sup>, Jiahao Guo<sup>2</sup>, Tian  
6 Wang<sup>2</sup>, Wei Li<sup>2</sup>, Jiaqi Zhao<sup>1,3</sup>

7

8 <sup>1</sup>Department of Ultrasound, the Second Affiliated Hospital of Naval Medical  
9 University (Shanghai Changzheng Hospital), Shanghai, China; <sup>2</sup>Department  
10 of Nanomedicine, Naval Medical University, Shanghai & School of Health  
11 Science and Engineering, University of Shanghai for Science and  
12 Technology, Shanghai, China; <sup>3</sup>Department of Ultrasound, Shanghai Fourth  
13 People's Hospital, School of Medicine, Tongji University, Shanghai, China

14 \*These authors contributed equally to this work

15

16 Correspondence: Jiaqi Zhao, Email: [ultrasoundczzjq@163.com](mailto:ultrasoundczzjq@163.com); Wei Li,

17 Email: [liwei@smmu.edu.cn](mailto:liwei@smmu.edu.cn)

18

19

20

21

22 **Supplementary Information**

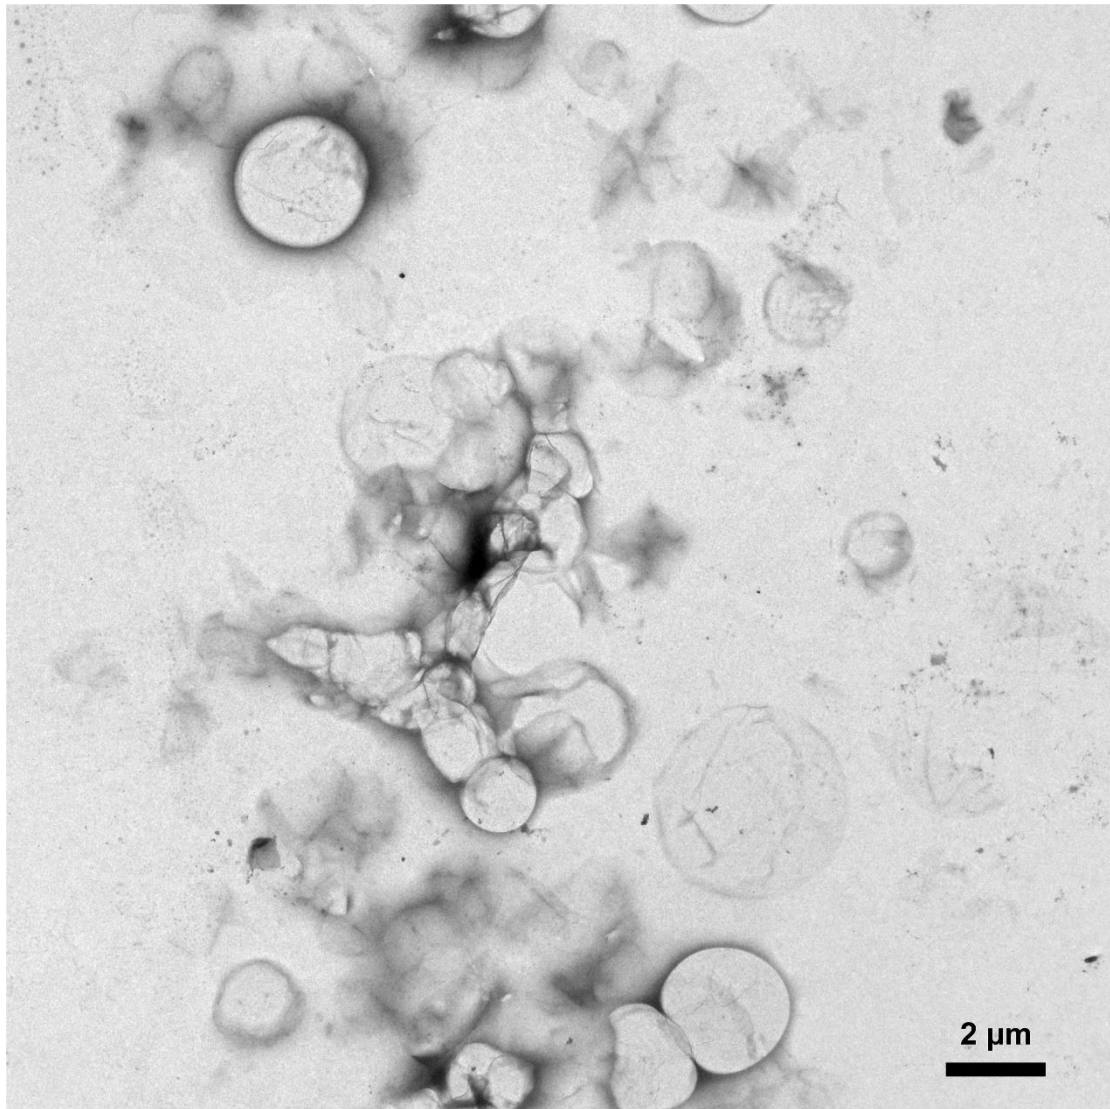

23

24 **Supplementary Figure 1** TEM image of Sonazoid at low magnification. Scale

25 bar=2 μm.

26

27

28

29

30

31

**A**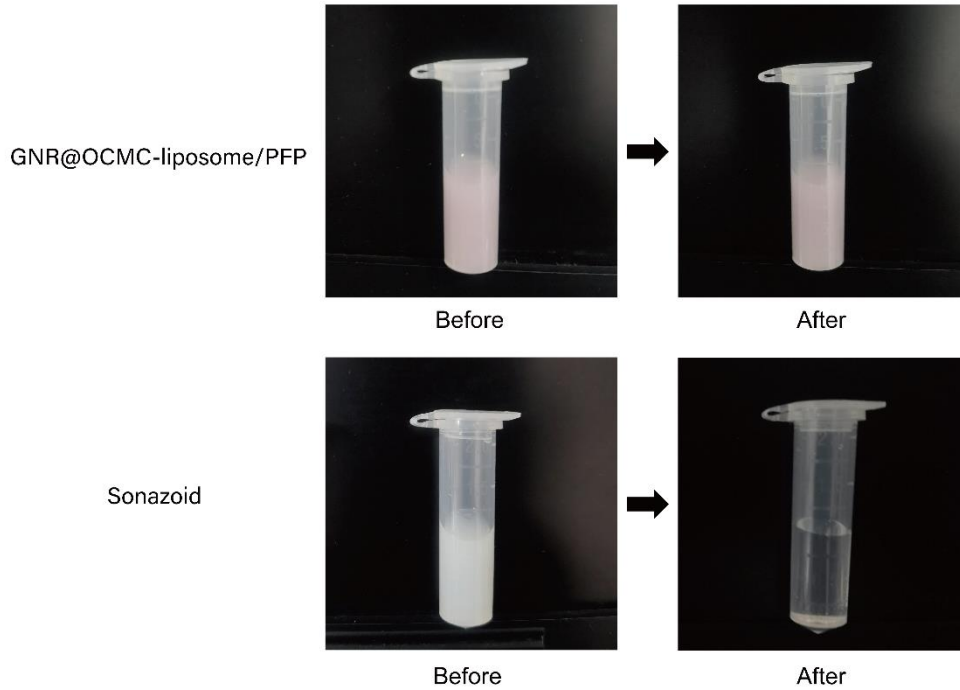**B**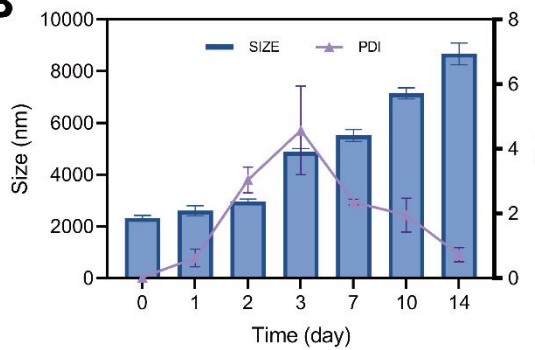**C**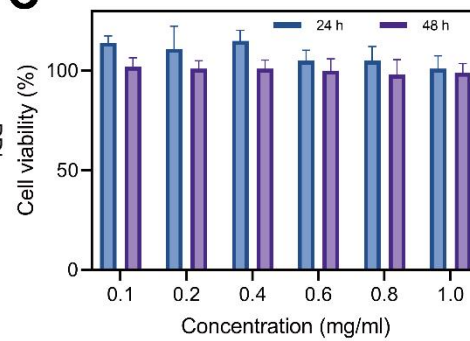

32

33 **Supplementary Figure 2** (A) The visual observations of GNR@OCMC-

34 liposome/PFP and Sonazoid at the beginning and end of the evaluation

35 period; (B) Plots showing the size of Sonazoid and its PDI with time at 4°C;

36 (C) Changes in C2C12 cell viability after 24 h and 48 h incubation with

37 Sonazoid.

38

39

40

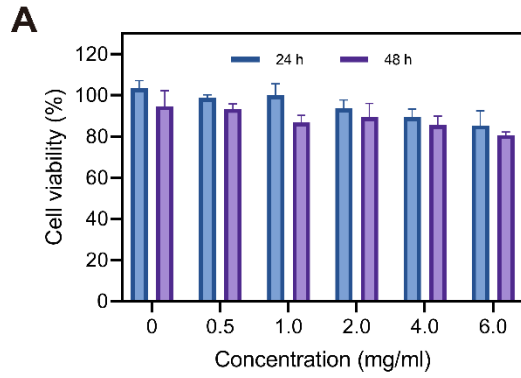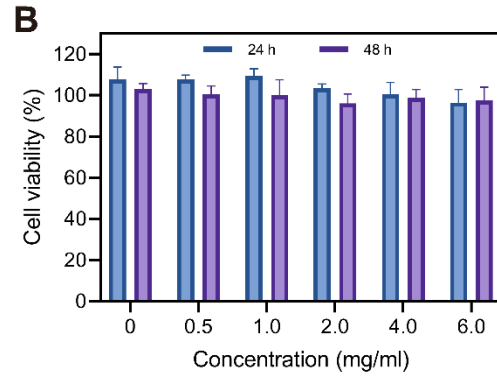

41

42 **Supplementary Figure 3** (A) Changes in C2C12 cell viability after 24 h and

43 48 h incubation with GNR@OCMC-liposome/PFP (0-6mg/ml); (B) Changes in

44 C2C12 cell viability after 24 h and 48 h incubation with Sonazoid (0-6mg/ml).

45

46

47

48

49

50

51

52

53

54

55

56

57

58

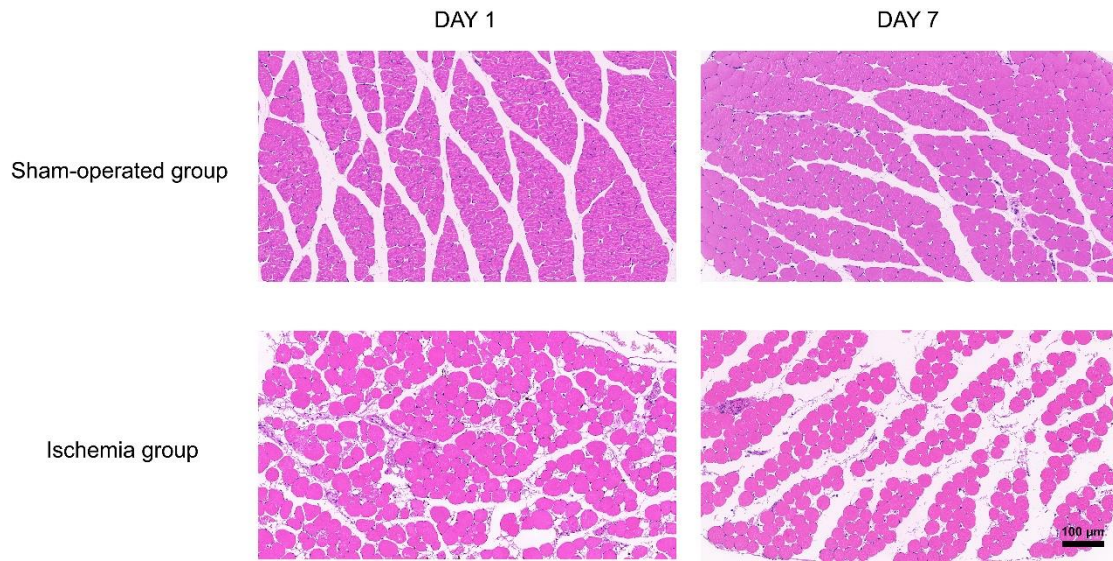

59

60 **Supplementary Figure 4** H&E staining results of the left hindlimb muscles of  
61 the sham-operated and ischemia groups at postoperative days 1 and 7. Scale  
62 bar=100 μm.

63

64

65

66

67

68

69

70

71

72

73

74

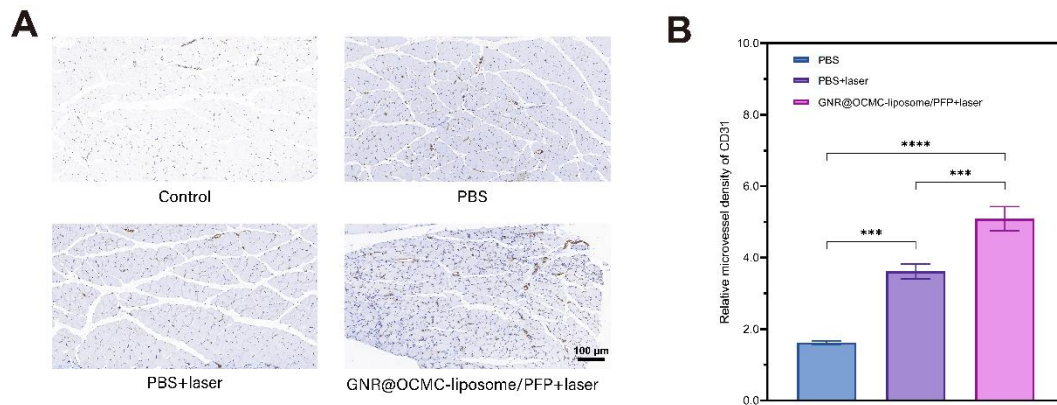

75

76 **Supplementary Figure 5** (A) Immunohistochemical results of CD31 in the left

77 hind limb muscle of mice in each group on day 7; (B) Quantification of relative

78 microvessel density as reflected by CD31 expression in each group compared

79 to the control group. \*\*\* indicates  $P < 0.001$ . Scale bar=100 μm.

80

81

82

83

84

85

86

87

88

89

90

91

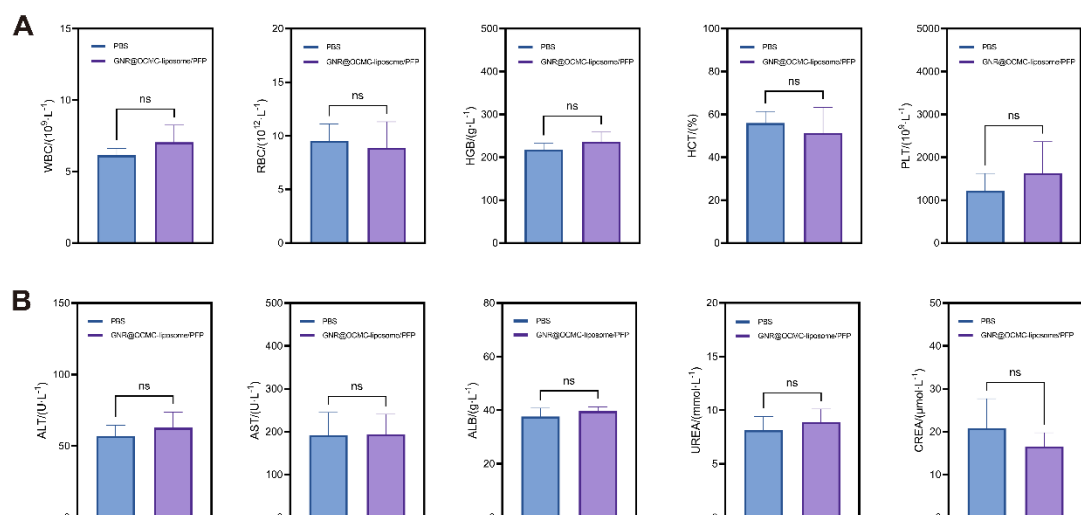

92

93 **Supplementary Figure 6 (A)** Hematological analyses of normal mice after 48

94 hours of injection of PBS and GNR@OCMC-liposome/PFP (WBC: white blood

95 cells; RBC: red blood cells; HGB: hemoglobin; HCT: hematocrit; PLT:

96 platelets). (B) Serum biochemical analyses of normal mice after 48 hours of

97 injection of PBS and GNR@OCMC-liposome/PFP (ALT: alanine

98 transaminase; AST: aspartate transaminase; ALB: albumin; UREA: blood

99 urea; CREA: creatinine). ns indicates that the difference was not statistically

100 significant.
